# Supplementary material for: Diversification of the ant odorant receptor gene family and positive selection on candidate cuticular hydrocarbon receptors
Source: PubMed Central journal article supplement (PMC4549895; doi:10.1186/s13104-015-1371-x), 2015-08-27

Orco

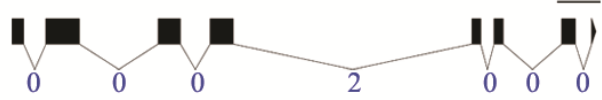

Subfamily A

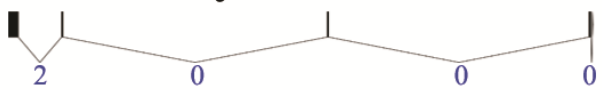

Subfamily B

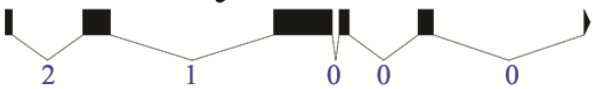

Subfamily C

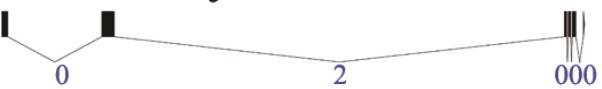

Subfamily D

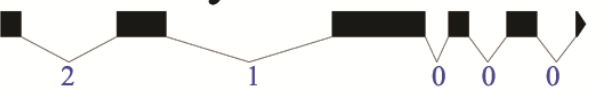

Subfamily E

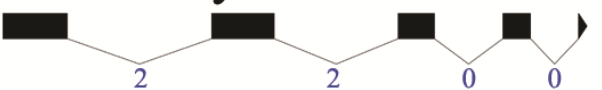

Subfamily F

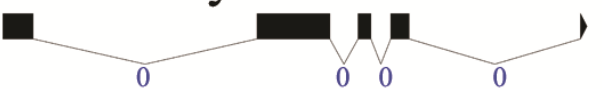

Subfamily G

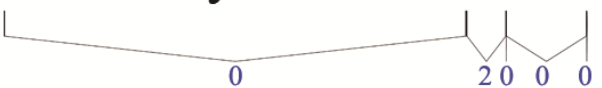

Subfamily H

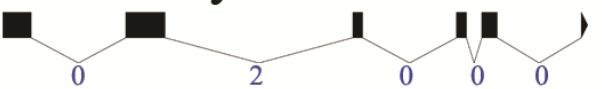

Subfamily 9-exon

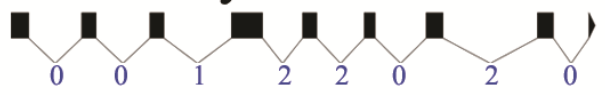

Subfamily I1

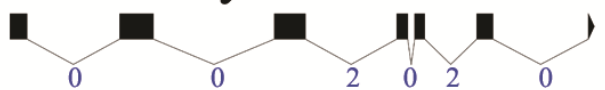

Subfamily I2

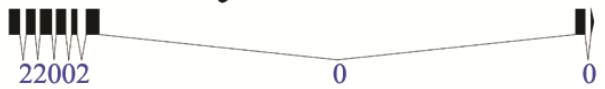

Subfamily I3

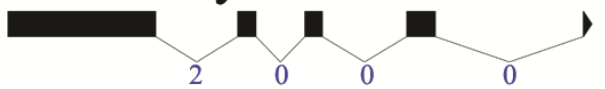

Subfamily J

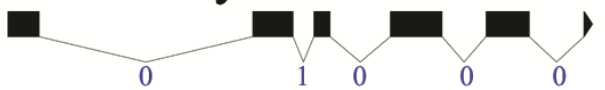

Subfamily K

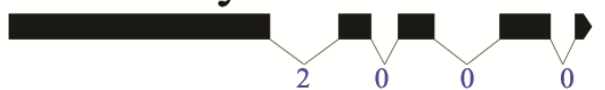

Subfamily L

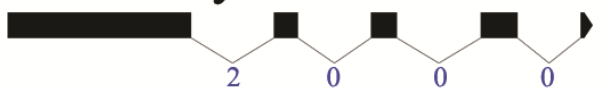

Subfamily M

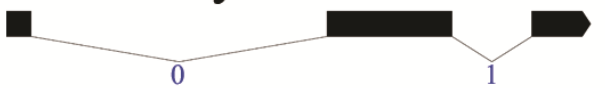

Subfamily N

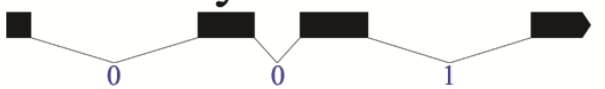

Scale bar = 500 base pairs

Subfamily O

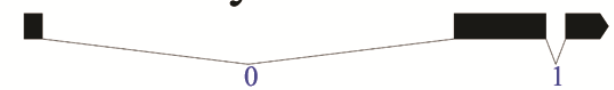

Subfamily P

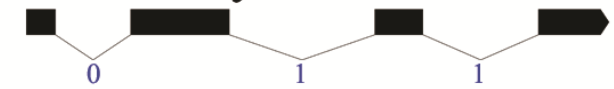

Subfamily Q

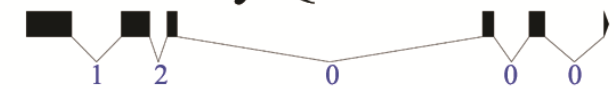

Subfamily R

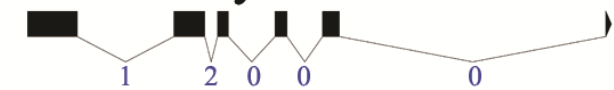

Subfamily S

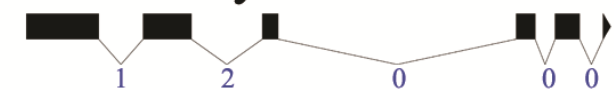

Subfamily T

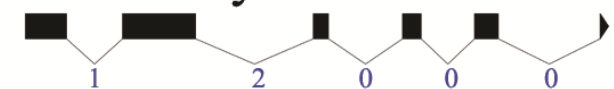

Subfamily U

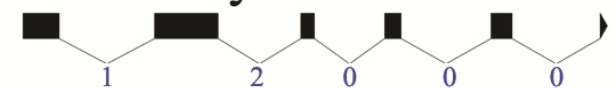

Subfamily V

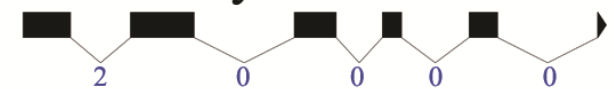

Supplement: 13104_2015_1371_MOESM3_ESM.pdf [file 13104_2015_1371_MOESM3_ESM.pdf]
