# Supplementary material for: Diversification of the ant odorant receptor gene family and positive selection on candidate cuticular hydrocarbon receptors
Source: PubMed Central journal article supplement (PMC4549895; doi:10.1186/s13104-015-1371-x), 2015-08-27

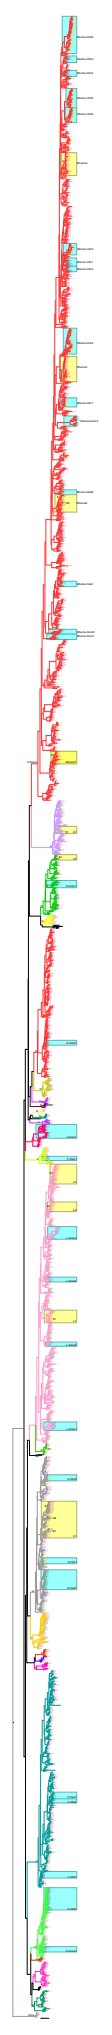

Supplement: 13104_2015_1371_MOESM2_ESM.pdf [file 13104_2015_1371_MOESM2_ESM.pdf]
